# Supplementary material for: A Survey of Clinical Evidence Evaluation Systems for Traditional Chinese Medicine
Source: Hindawi journal article supplement (doi:10.1155/2021/8883921), 2021-01-21
Supplement: f1 [file 8883921.f1.docx]

**Questionnaire on Clinical Evidence Evaluation of**

**Traditional Chinese Medicine**

1. Your occupation: [Single Choice]

○Clinicians

○Nurse

○Management

○University teachers

○Researchers

○Students

○Others_________________

2. Your educational background [Single Choice]

○Doctorate

○Master

○Bachelor

○Junior college or below

3. Your professional titles: [Single Choice]

○Senior title

○Intermediate title

○Junior title

○Others_________________

4. Your organization: [Single Choice]

○Colleges and universities

○Scientific research institution

○Government sector

○Pharmaceutical / medical device enterprises

○Higher medical institutions

○Primary medical institutions

○Others_________________

5. Your work experience: [Single Choice]

○Less than 5 years

○5-10years

○11-20years

○21-30years

○More than 30 years

6. Your professional field: [Single Choice]

○Traditional Chinese Medicine

○Western Medicine

○Integrated Medicine

7. How well do you understand the clinical evidence evaluation system: [Single Choice]

○Very well

○Well

○Normal

○A little bit

○Not at all

8. How often do you use the clinical evidence evaluation system: [Single Choice]

○Very frequently

○Frequently

○Occasional

○Infrequently

○Never

9. Which of the following evidence evaluation systems you known: [Multiple Choice]

□OCEBM -Five-level evidence system

□SIGN system

□Evidence pyramid

□GRADE system

□Others_________________

10. How well do you know the following systems:[Single Choice for Each Line]

Very well Well Normal Not-so-much Not-at-all

OCEBM system ○ ○ ○ ○ ○

SIGN system ○ ○ ○ ○ ○

Evidence pyramid ○ ○ ○ ○ ○

GRADE system ○ ○ ○ ○ ○

11. How well do you understand the GEADE System: [Single Choice]

○Very well

○Well

○Normal

○A little bit

○Not at all

12. How often do you use the GEADE System: [Single Choice]

○Very frequently

○Frequently

○Occasional

○Infrequently

○Never

13. Purposes of using the "GRADE system": [Multiple Choice]

□When clinical problems arise

□During research design

□When writing manuscript

□When evaluating the quality of other studies

□Others _________________

14. How well do you understand the TCM-evidence System: [Single Choice]

○Very well

○Well

○Normal

○A little bit

○Not at all

15. How often do you use the TCM-evidence System: [Single Choice]

○Very frequently

○Frequently

○Occasional

○Infrequently

○Never

16. Which of the following TCM clinical evidence evaluation systems do you knows:

[Multiple Choice]

□Liu Jianping - Composition and classification of evidence in traditional medicine

□Wang Shouchuan - Evidence-based Chinese medicine clinical practice guidance evidence grading system

□Wang Jie - TCM clinical evidence grading and scoring system

□Zhong Jingbai - TCM clinical evidence evaluation method

□Liang Fanrong - Acupuncture clinical research evidence evaluation system

□Others _________________

17. Which of the following methods do you incline to use while evaluating TCM clinical evidence:[Multiple Choice]

□OCEBM system

□GRADE system

□5 Level system of TCM version(Liu Jianping Version)

□The self-created evaluation method

□Others _________________

18. What's your comments on using any of current methods to evaluate TCM evidence: [Multiple Choice]

□Improve the quality of articles

□Improve work efficiency

□Improve the level of clinical decision making

□It doesn't matter

□Not easy to understand

□It is too complicated to use

□Others _________________

19. What's the troubles do you have while using any of current methods to evaluate clinical evidence of TCM: [Multiple Choice]

□Hard to obtain evidence, especially high-quality evidence

□Lack of clear evaluation criteria

□Difficult to carry out the evaluation

□Little clinical significance and poor practicability

□Low credibility and no reference value

□Others _________________

20. Have you ever used "GRADE system" to evaluate TCM evidence？ [Single Choice]

○Yes

○No

21. What is your opinion toward using the "GRADE system" to evaluate the clinical evidence of TCM？ [Single Choice]

○Completely applicable without any modification

○Acceptable after some modification

○Unacceptable

○Others _________________

22. What's your comments on applying "GRADE system" to evaluate TCM evidence？ [Multiple Choice]

□It can be well applied and improve the decision-making level

□Generally lower level of evidence limited the usage of GRADE

□"Treating the same disease with different methods" leads to higher risk of consistency bias

□Higher priority evidences, such as TCM ancient case reports, leveled lower in GRADE

□Others _________________

23. What are the problems while evaluating TCM clinical evidence？ [Multiple Choice]

□Lots of evaluation systems and difficult to choose

□Same evidences may varies greatly in different systems

□The evaluation process is opaque and subjective

□Most of methods do not involve of recommendations

□The process is complicated and difficult to be applied in practice

□Little help for clinical decision making

□Others _________________

24. Is it reasonable to upgrade the levels of some typical TCM evidences, such as "ancient medical records and expert's experience"？ [Single Choice]

○Yes

○No

○Unclear

○Others _________________

25. What's extra suggestions do you have for TCM-evidence System？ [Fill in the Blanks]

_________________________________
